# Supplementary material
Source: MDPI journal article supplement (https://www.mdpi.com/search?q=molecules-23-03254)
Supplement: s001 [file molecules-23-03254-s001.pdf]

# Supplementary Materials

Effects of *Toona sinensis* leaf extract and its chemical constituents on xanthine oxidase activity and serum uric acid levels in potassium oxonate-induced hyperuricemic rats

Heung Joo Yuk <sup>1,†</sup>, Young-Sil Lee <sup>1,†</sup>, Hyung Won Ryu <sup>2</sup>, Seung-Hyung Kim <sup>3</sup> and Dong-Seon Kim <sup>1,\*</sup>

|                                                                                                                      |       |
|----------------------------------------------------------------------------------------------------------------------|-------|
| <b>Title page</b> .....                                                                                              | 1     |
| <b>Figure S1–5.</b> <sup>1</sup> H-NMR spectrum of compounds (1–5) .....                                             | 2–6   |
| <b>Figure S6–10.</b> <sup>13</sup> C-NMR spectrum of compounds (1–5) .....                                           | 7–11  |
| <b>Figure S11–15.</b> Identification of compounds (1–5) by UPLC-qTof MS .....                                        | 12–16 |
| <b>Figure S16.</b> Effects of compound 4 (40 mg/kg) on serum uric acid levels in PO-induced hyperuricemic rats ..... | 17    |

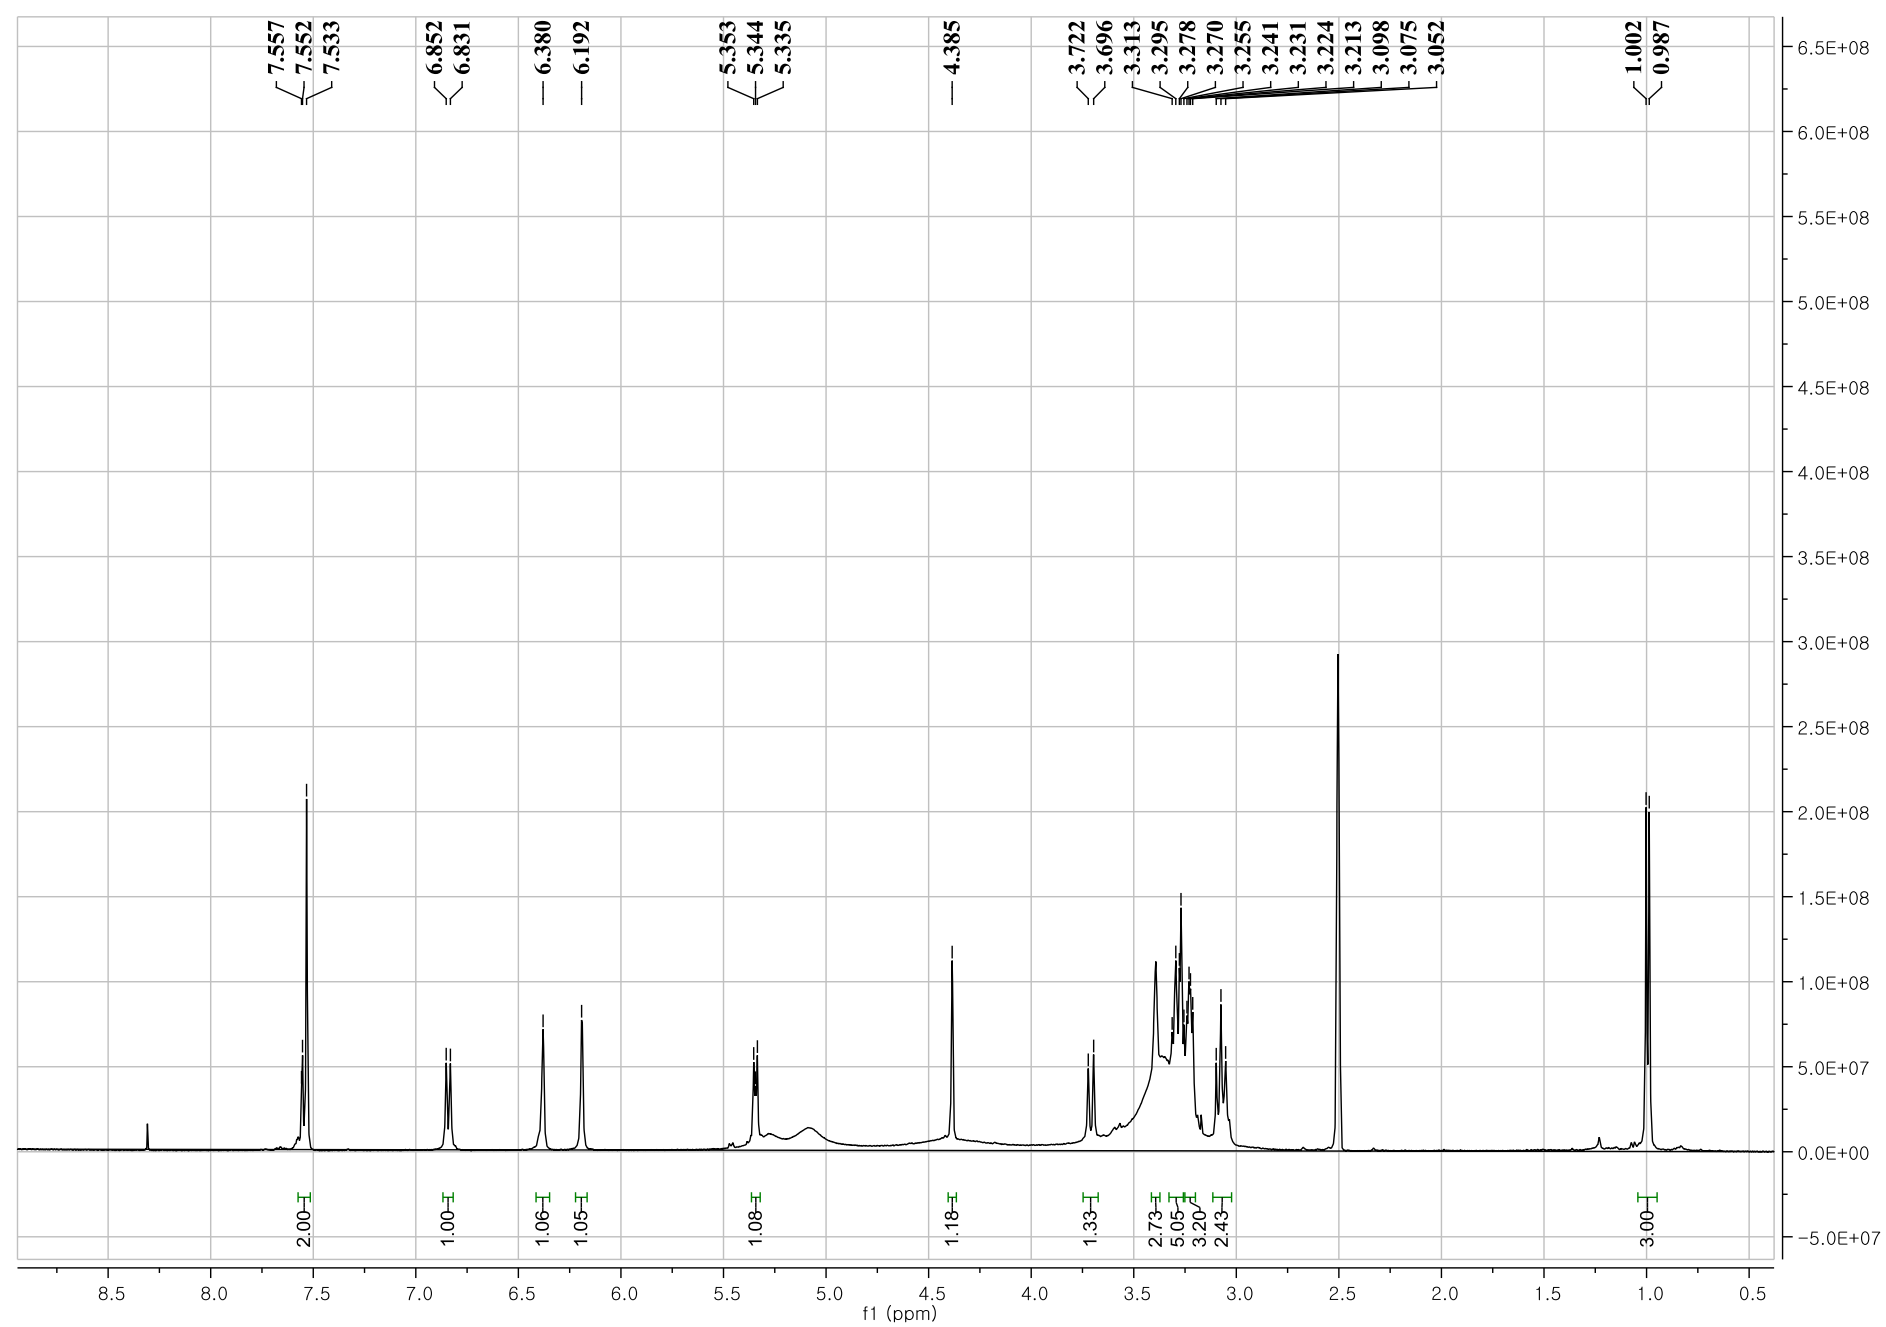

**Figure S1.** <sup>1</sup>H-NMR spectrum of compound **1** (400 MHz, DMSO-d<sub>6</sub>).

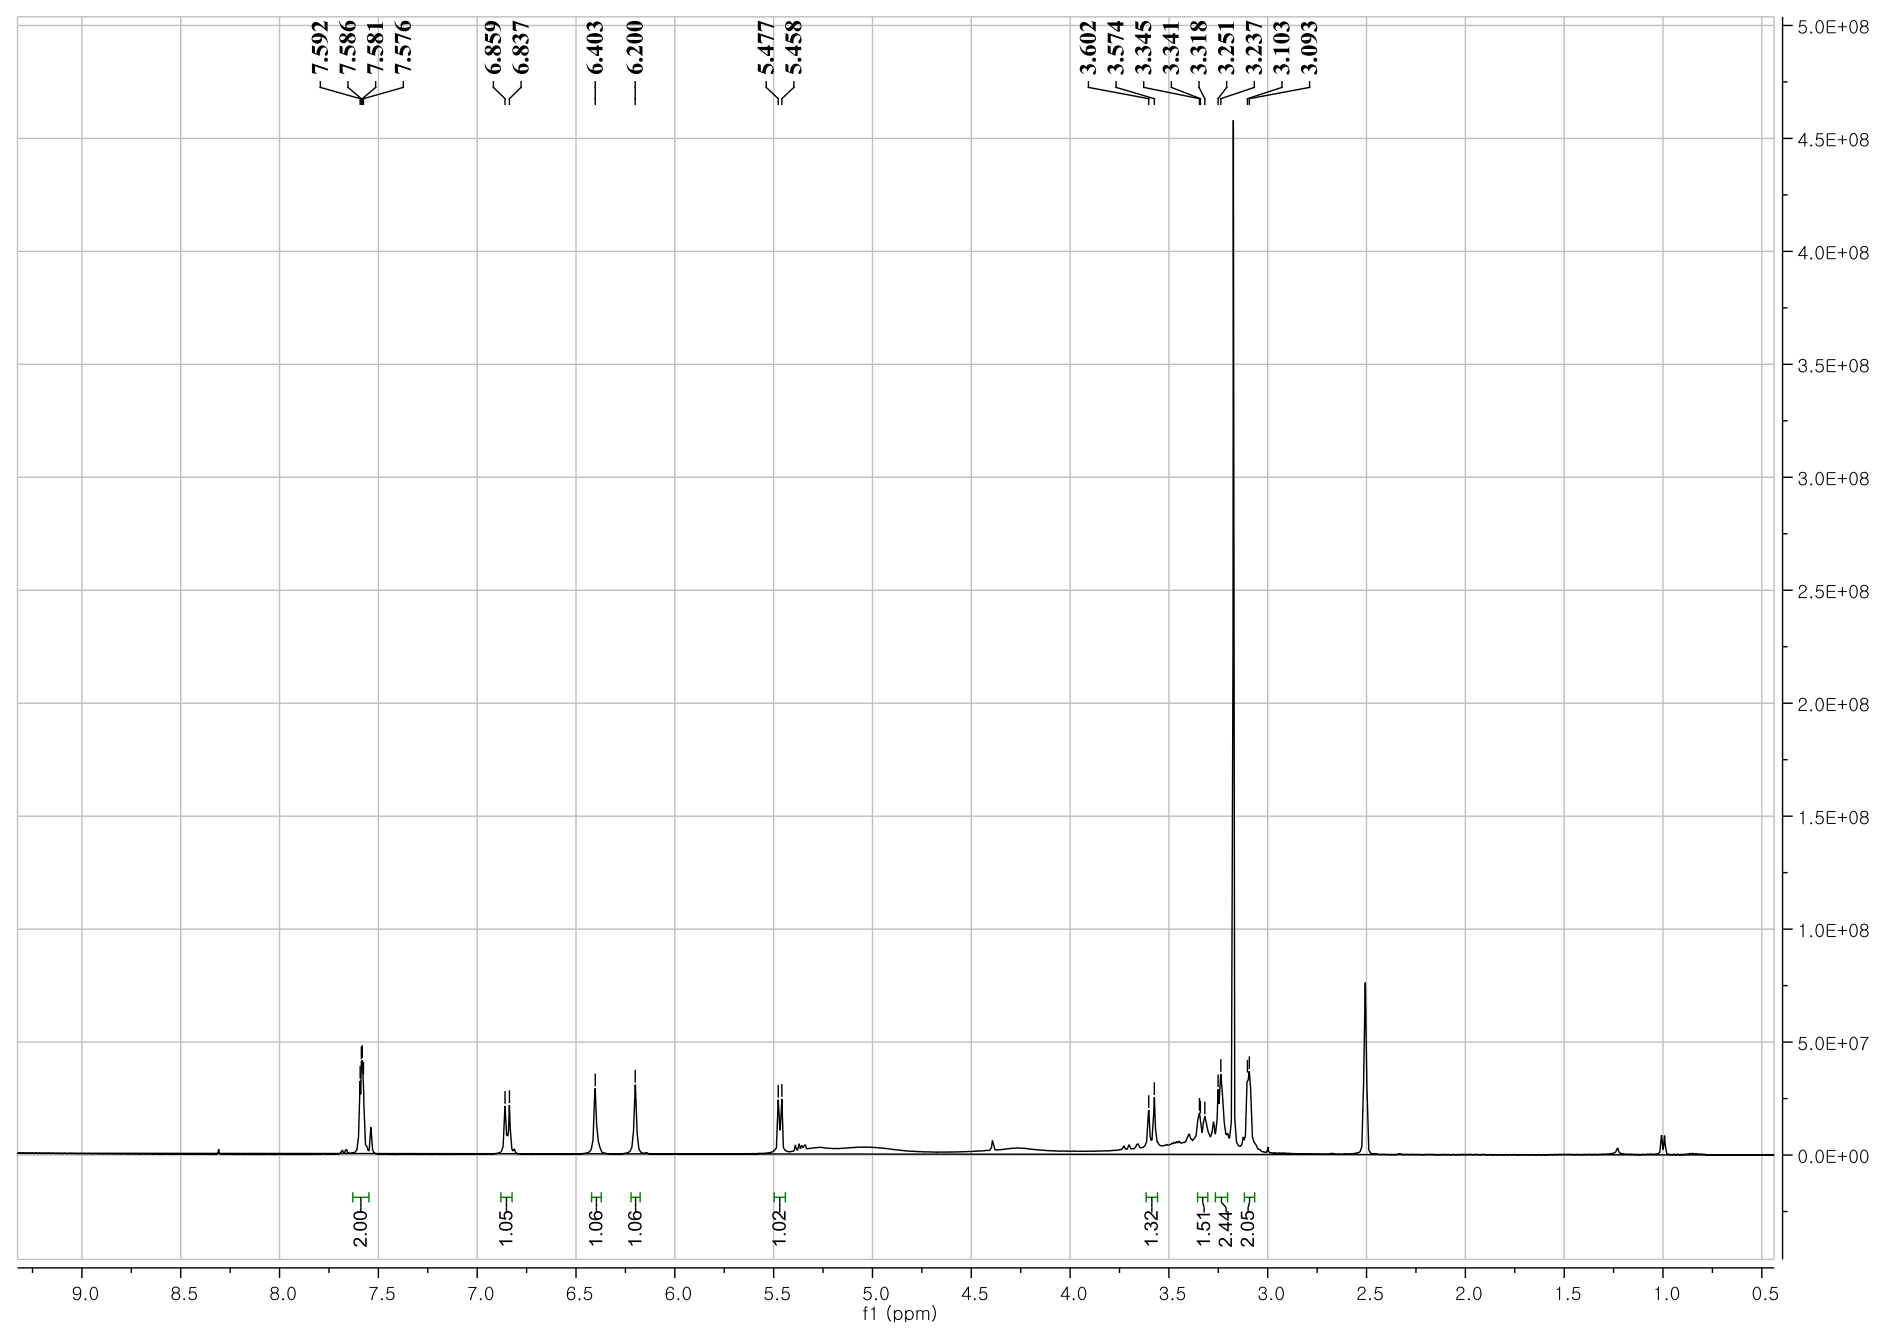

**Figure S2.** <sup>1</sup>H-NMR spectrum of compound 2 (400 MHz, DMSO-*d*<sub>6</sub>).

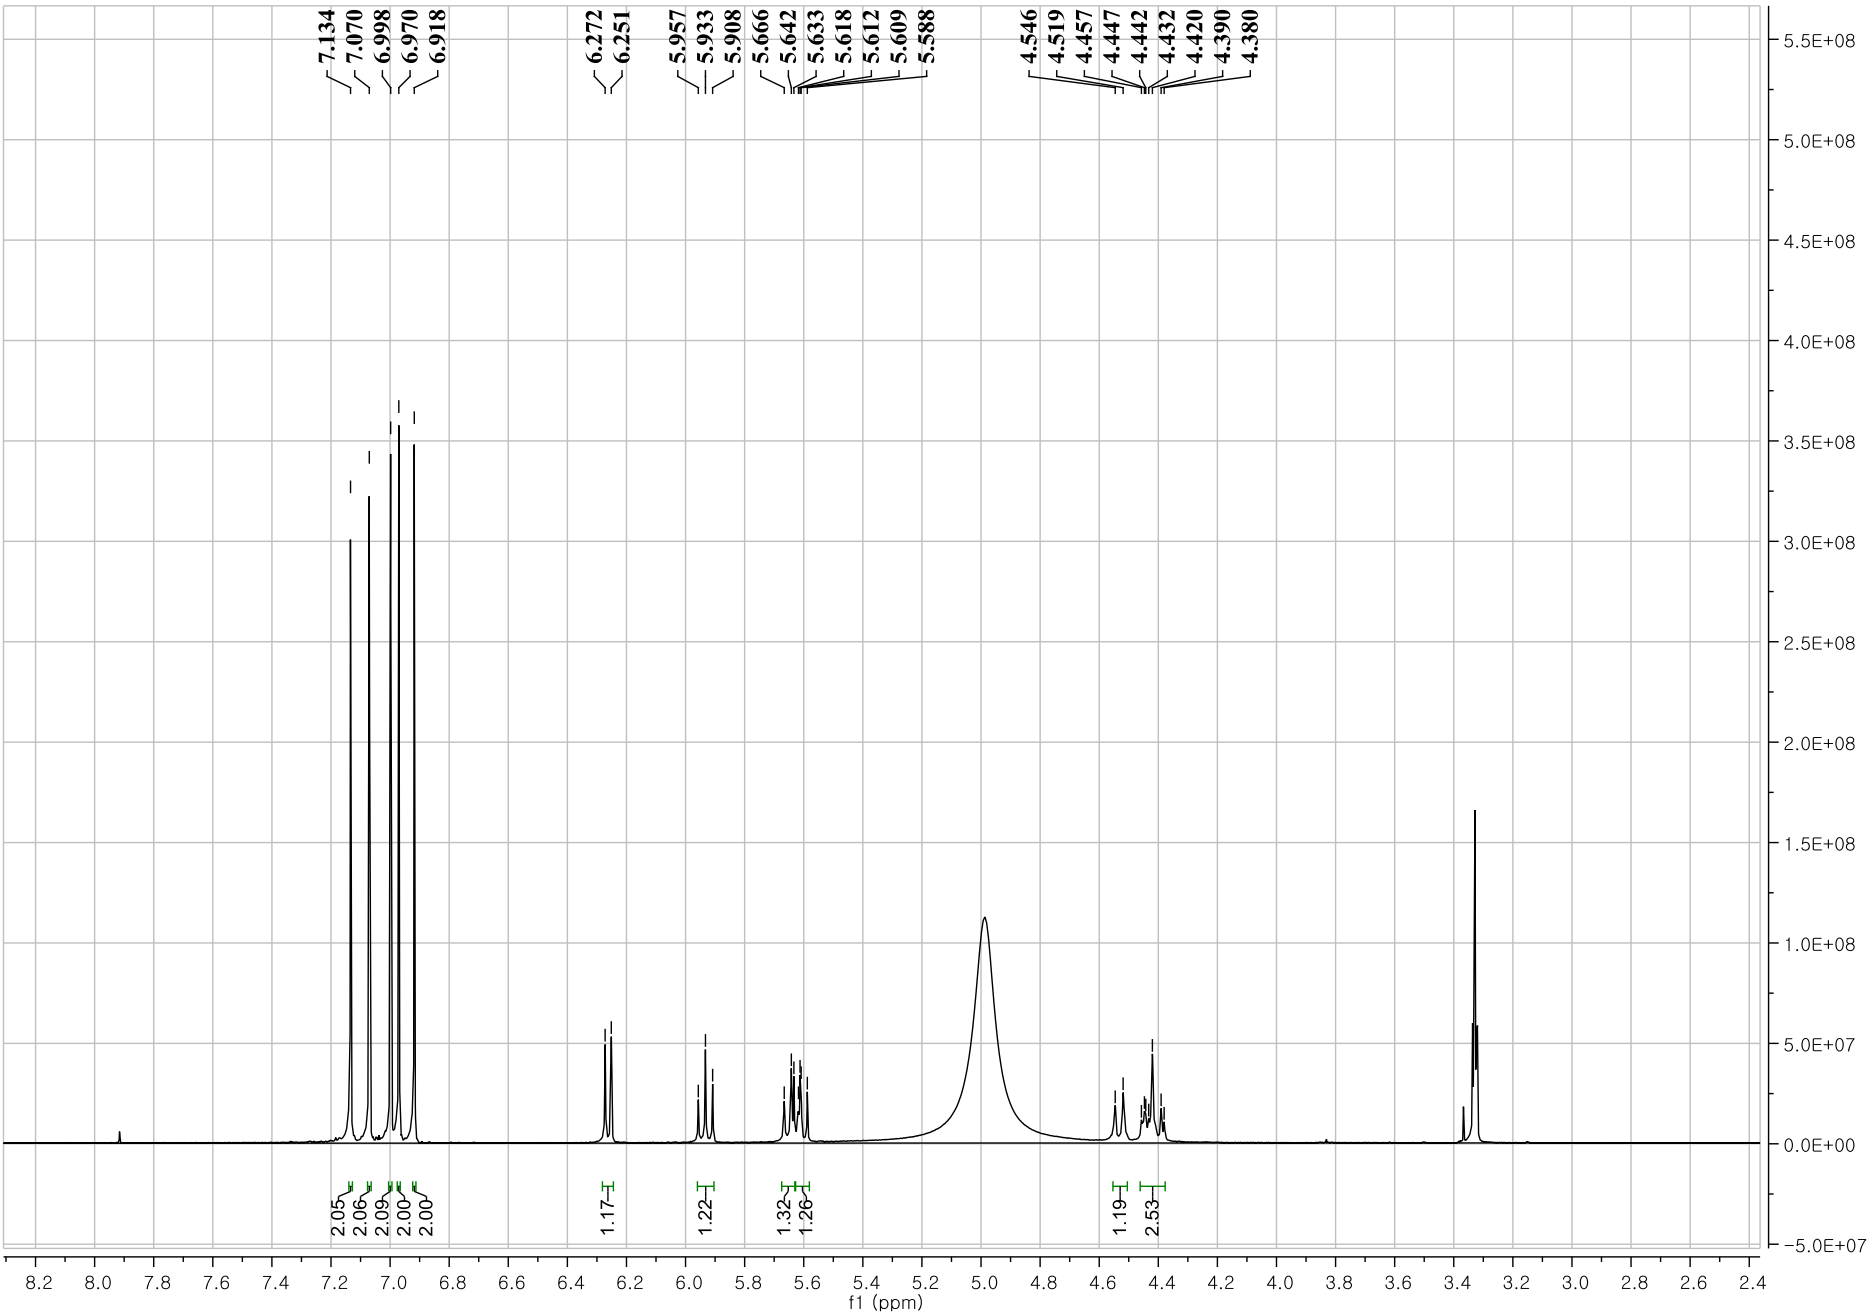

**Figure S3.**  $^1\text{H-NMR}$  spectrum of compound **3** (400 MHz,  $\text{CD}_3\text{OD}$ ).

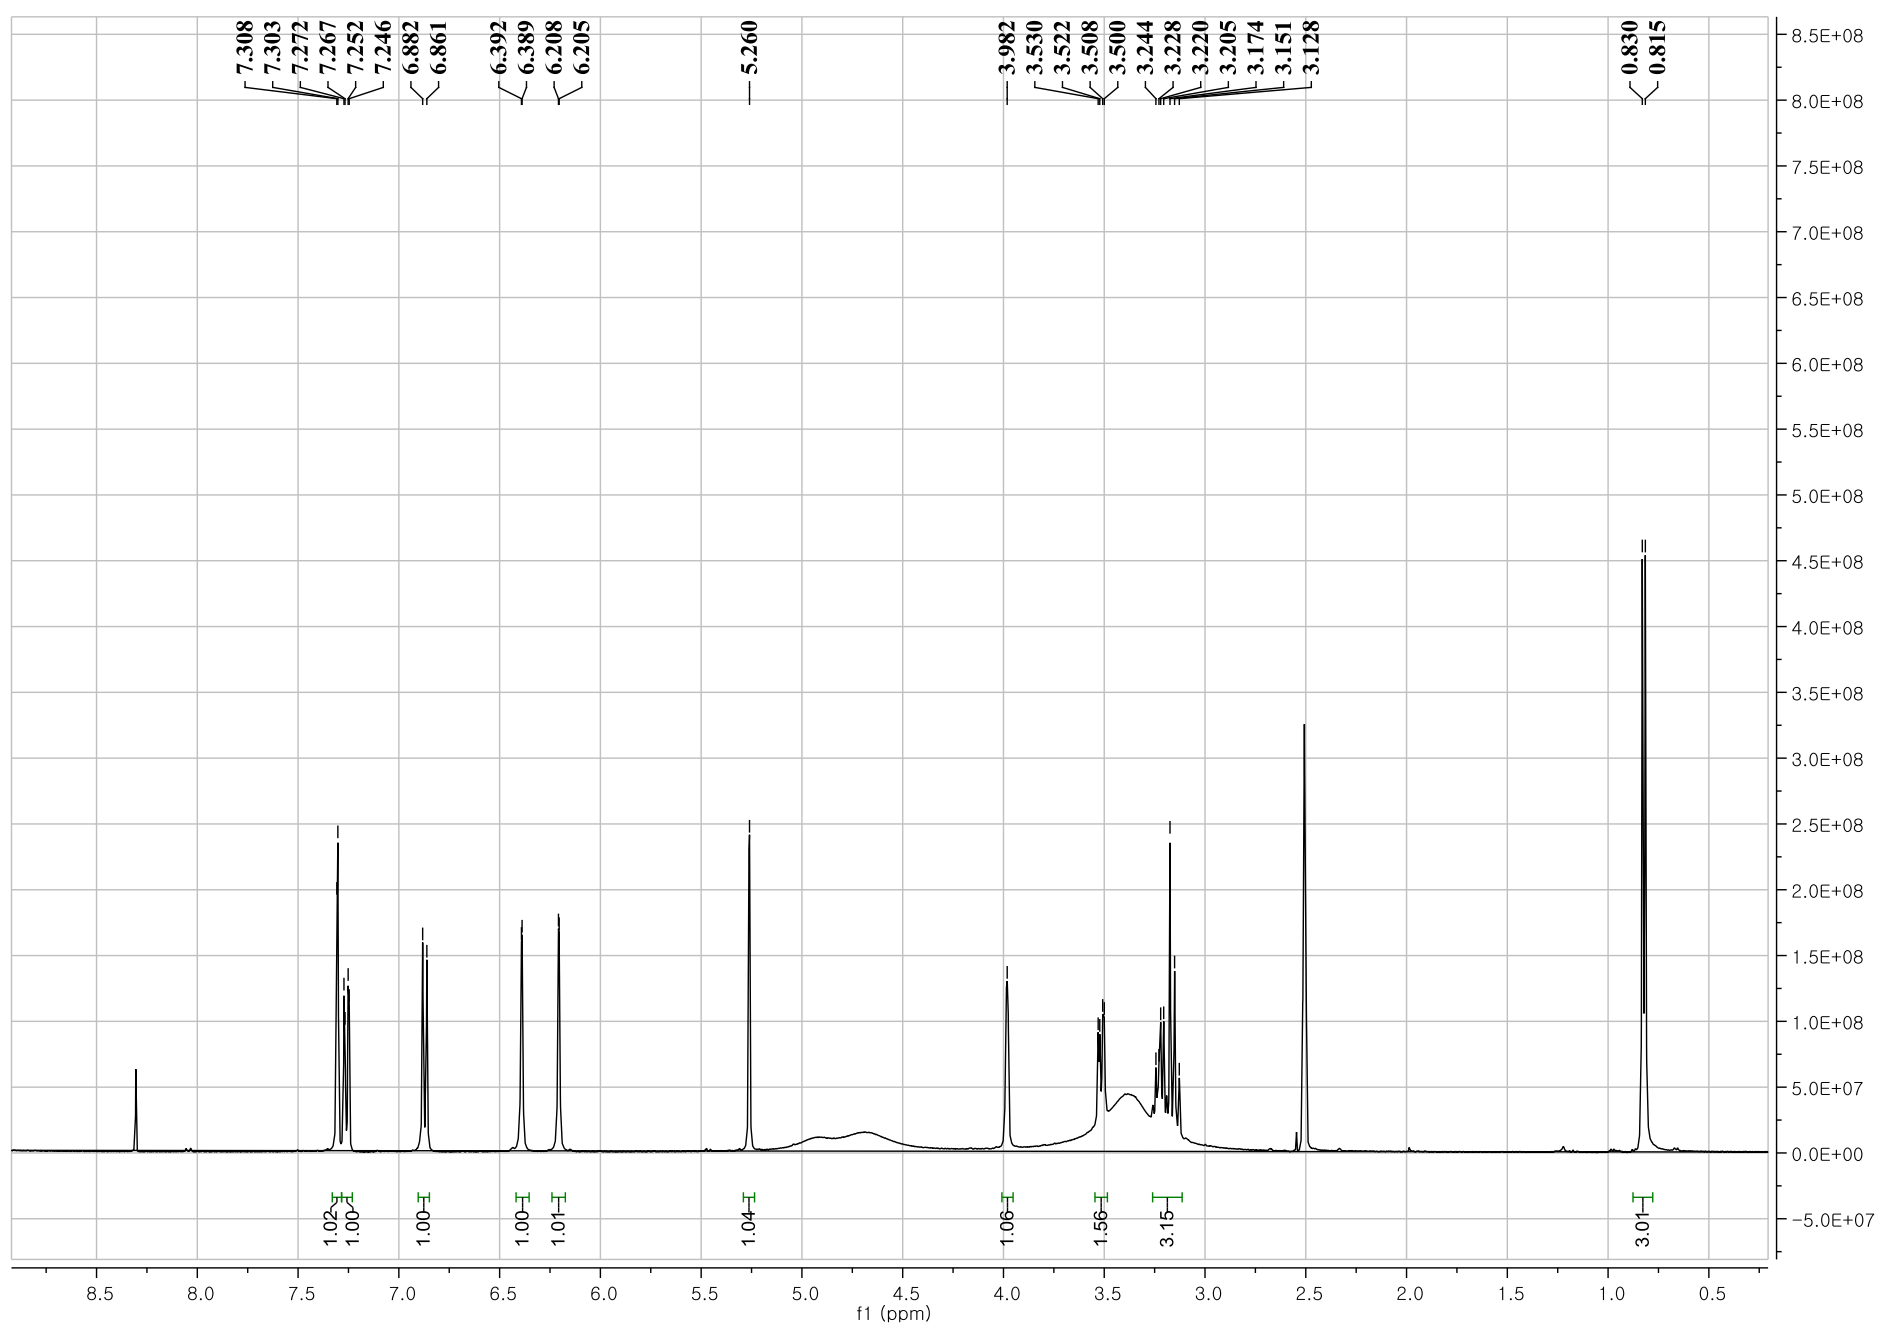

Figure S4. <sup>1</sup>H-NMR spectrum of compound 4 (400 MHz, DMSO-*d*<sub>6</sub>).

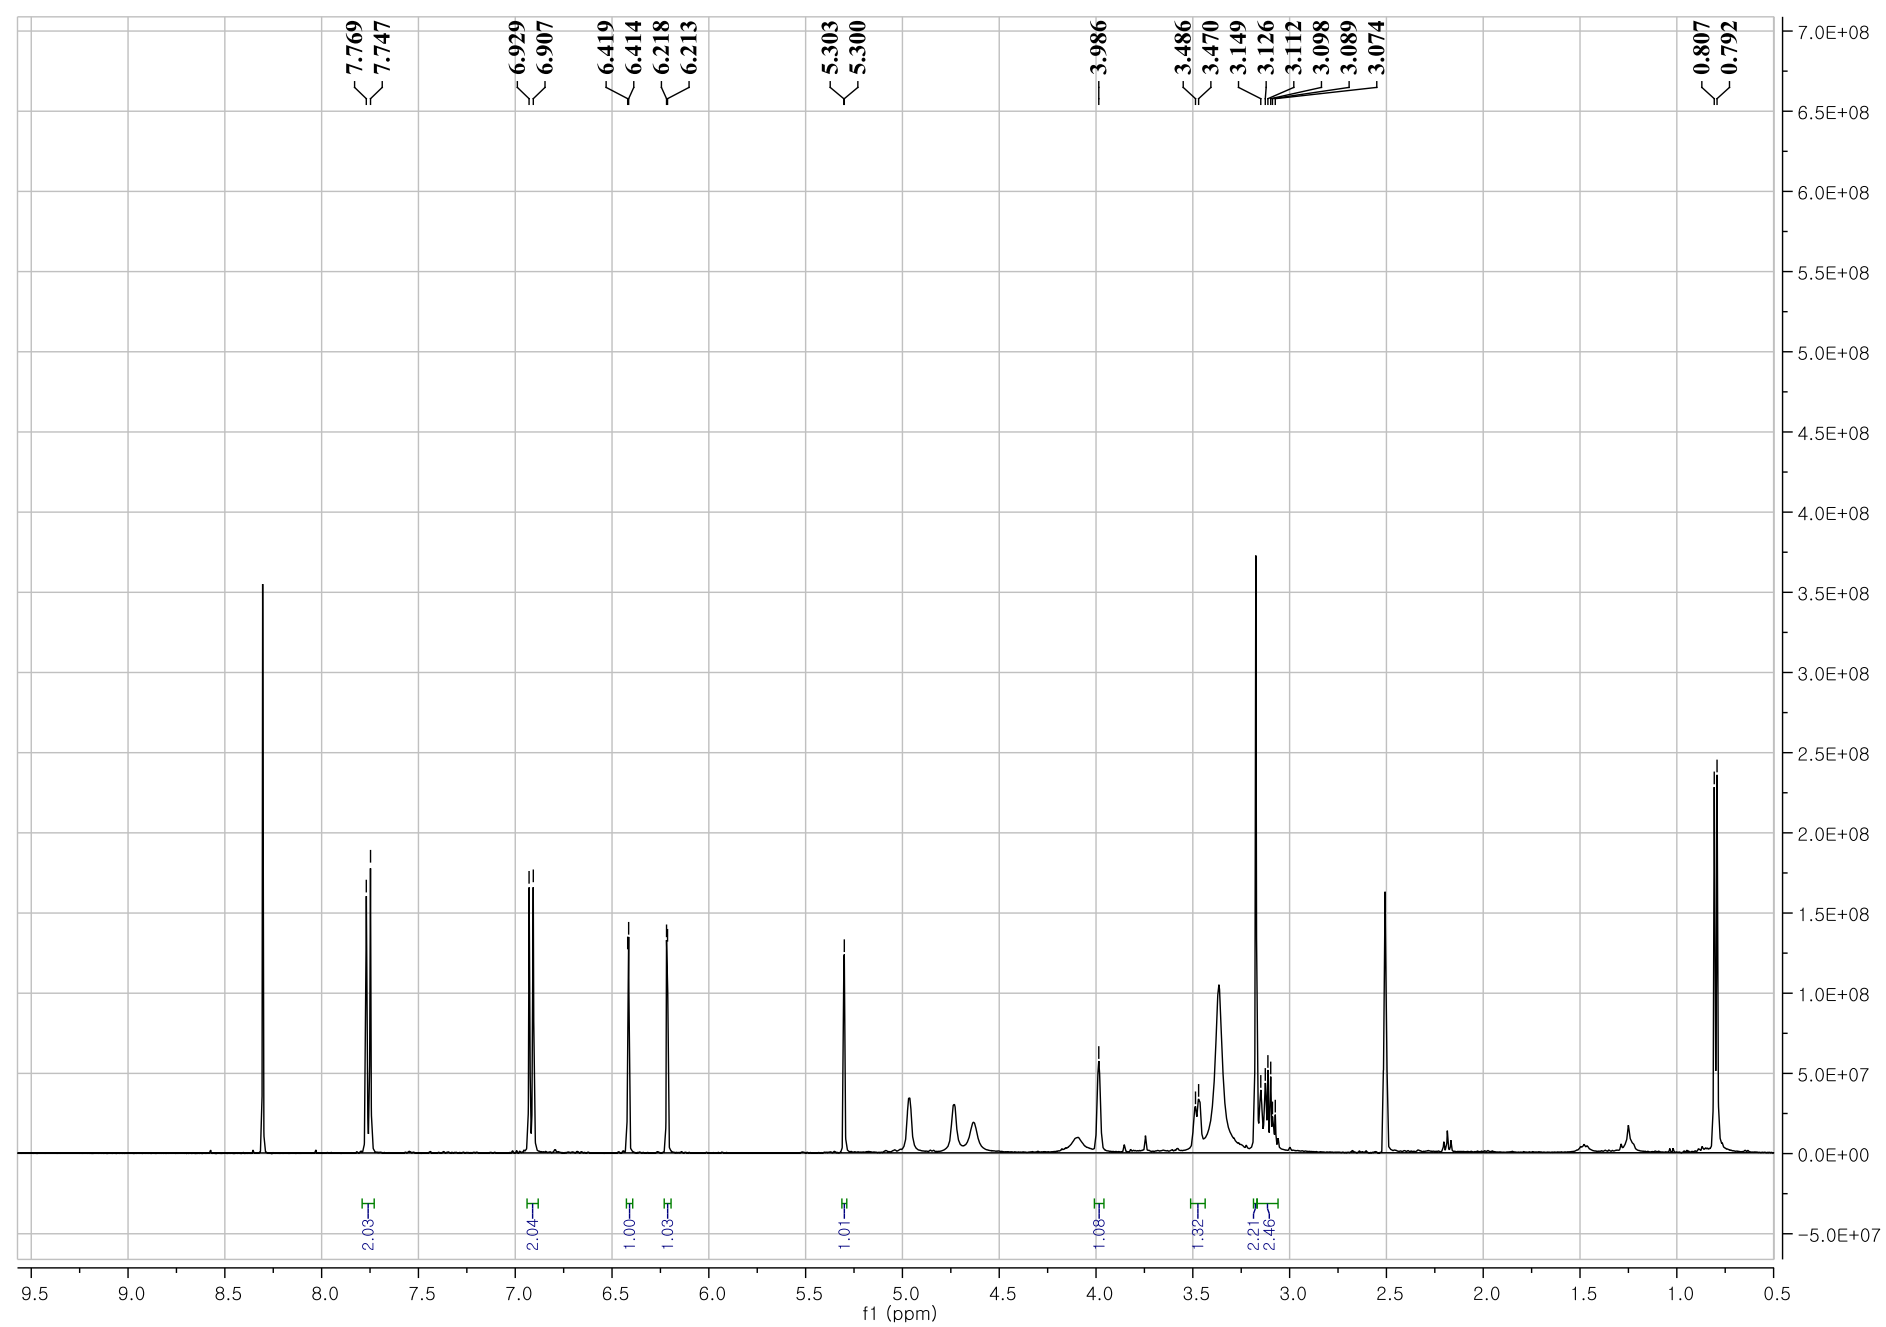

**Figure S5.**  $^1\text{H-NMR}$  spectrum of compound **5** (400 MHz,  $\text{DMSO-}d_6$ ).

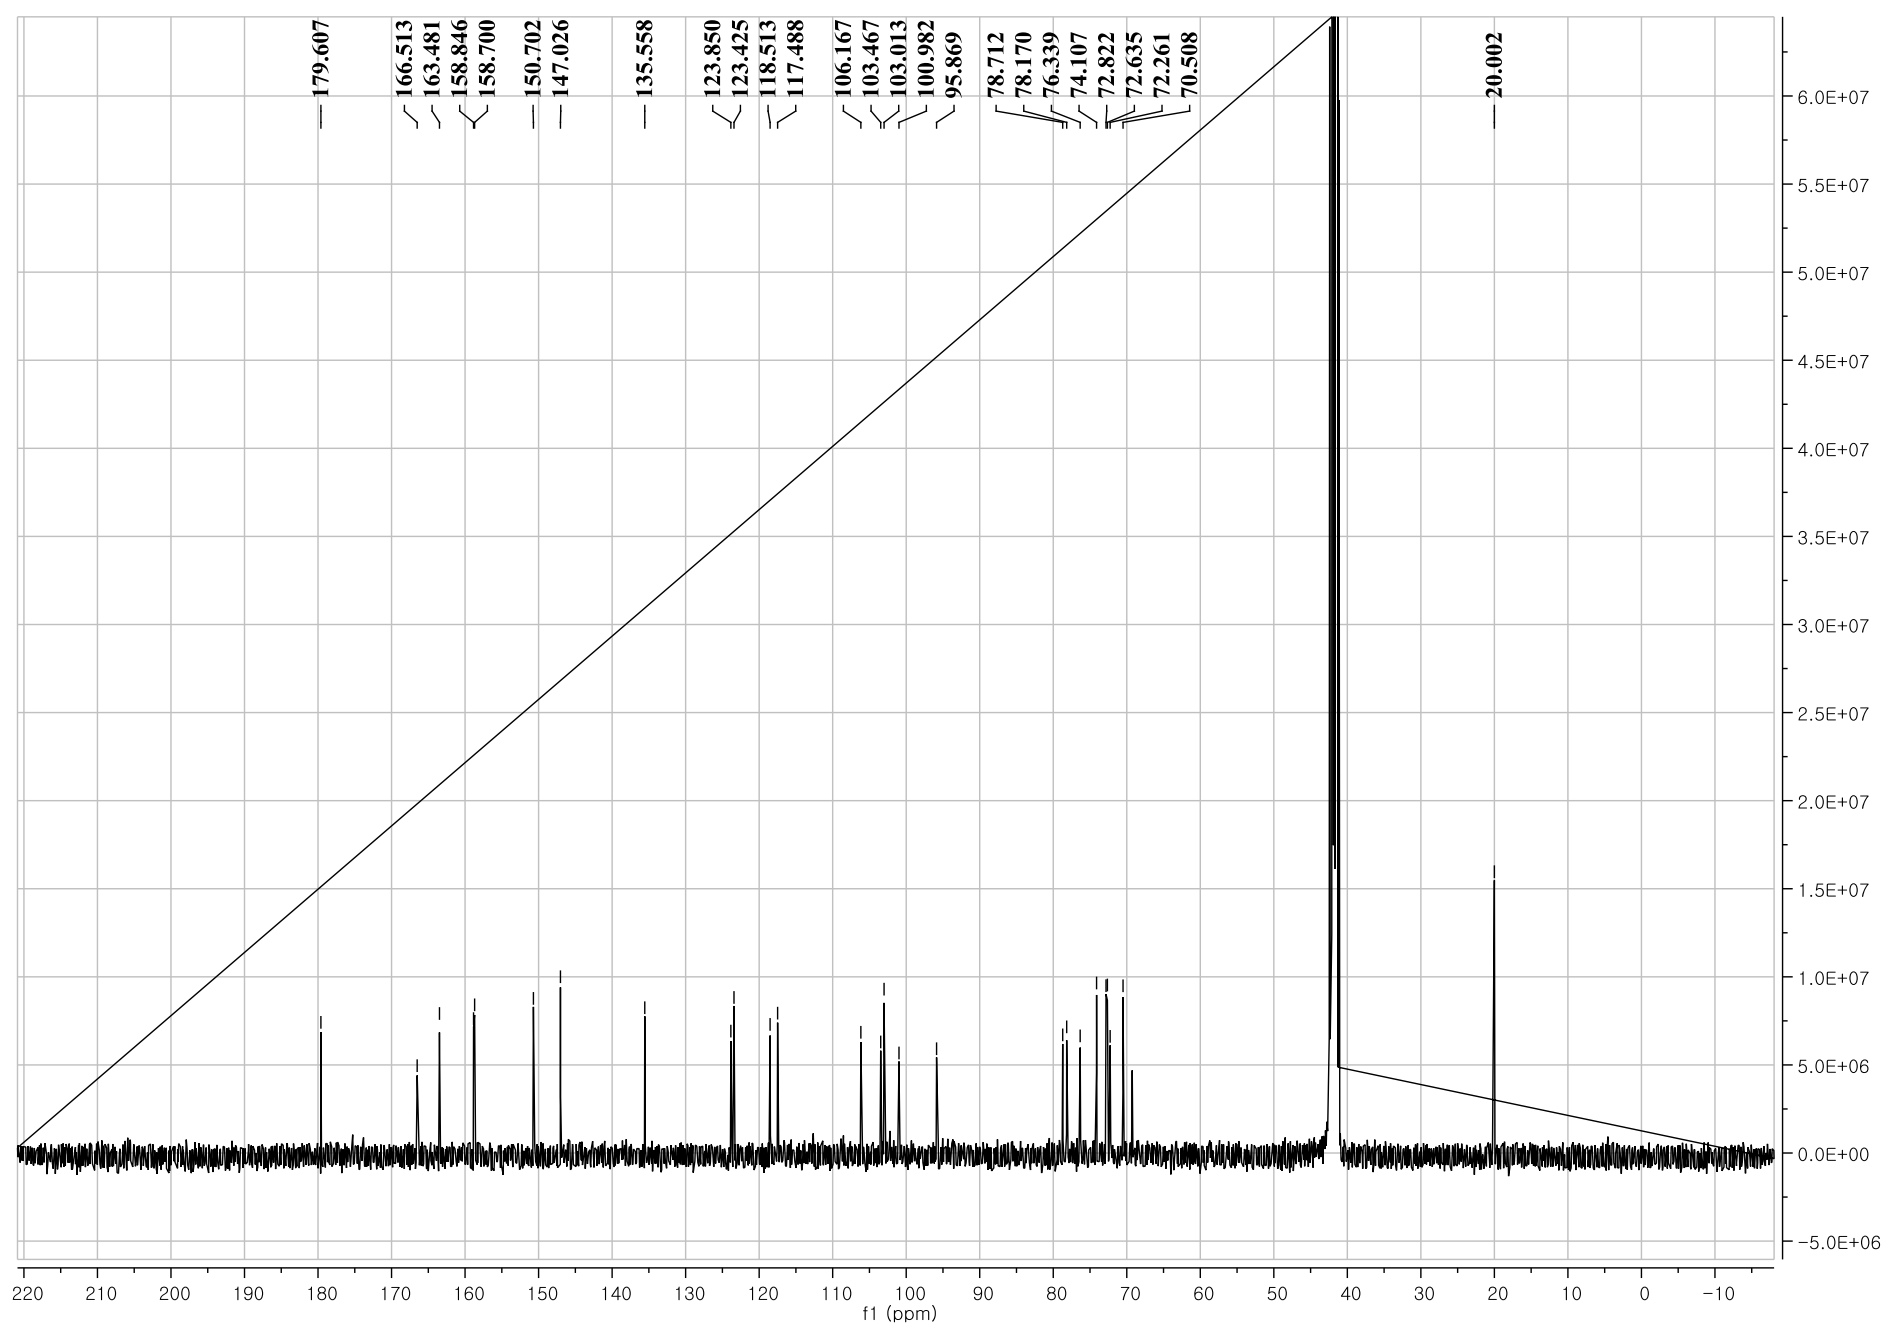

**Figure S6.**  $^{13}\text{C}$ -NMR spectrum of compound **1** (100 MHz,  $\text{DMSO-}d_6$ ).

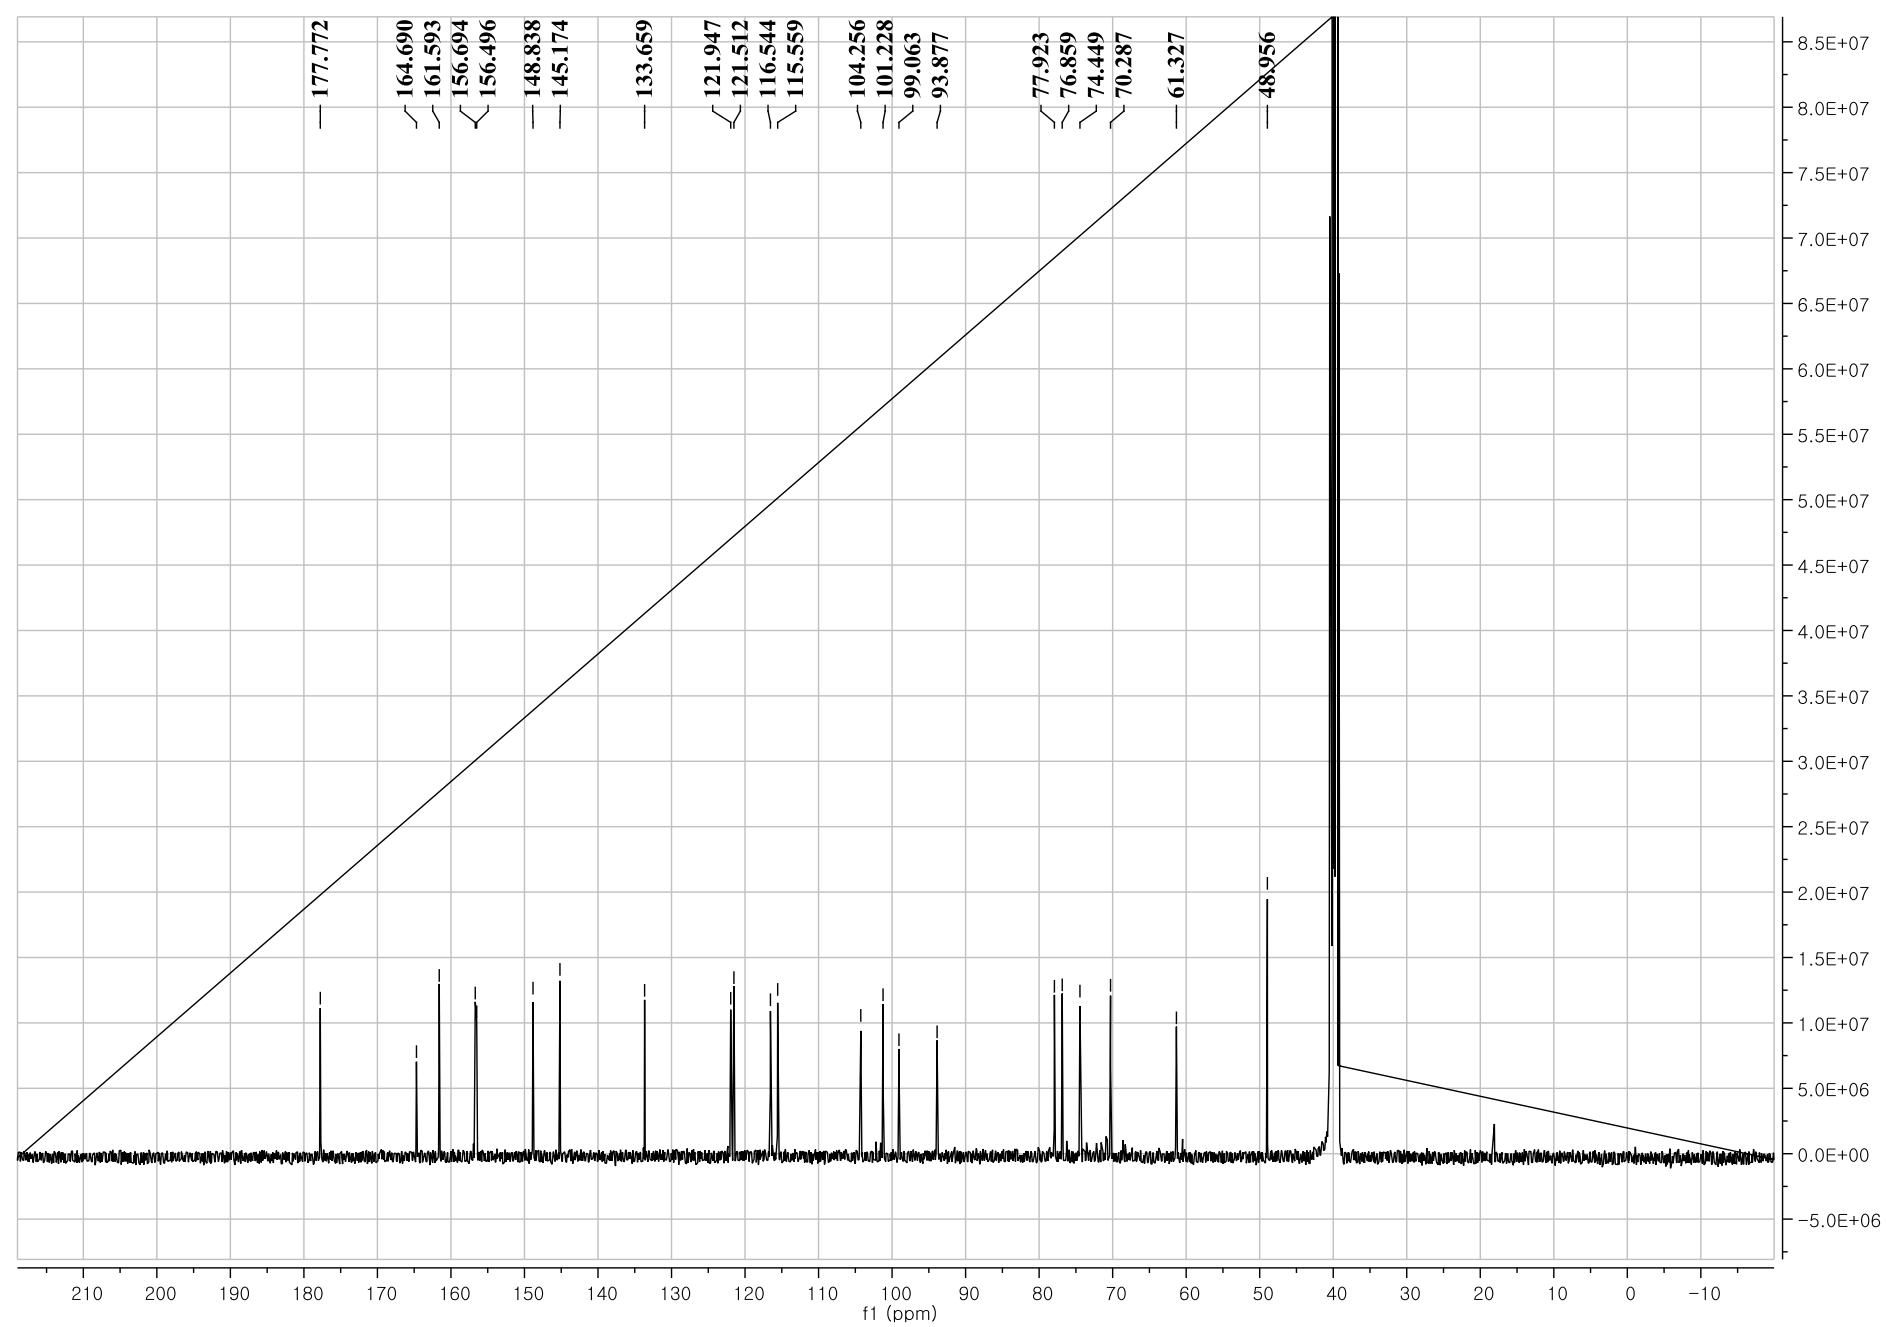

Figure S7.  $^{13}\text{C}$ -NMR spectrum of compound 2 (100 MHz,  $\text{DMSO}-d_6$ ).



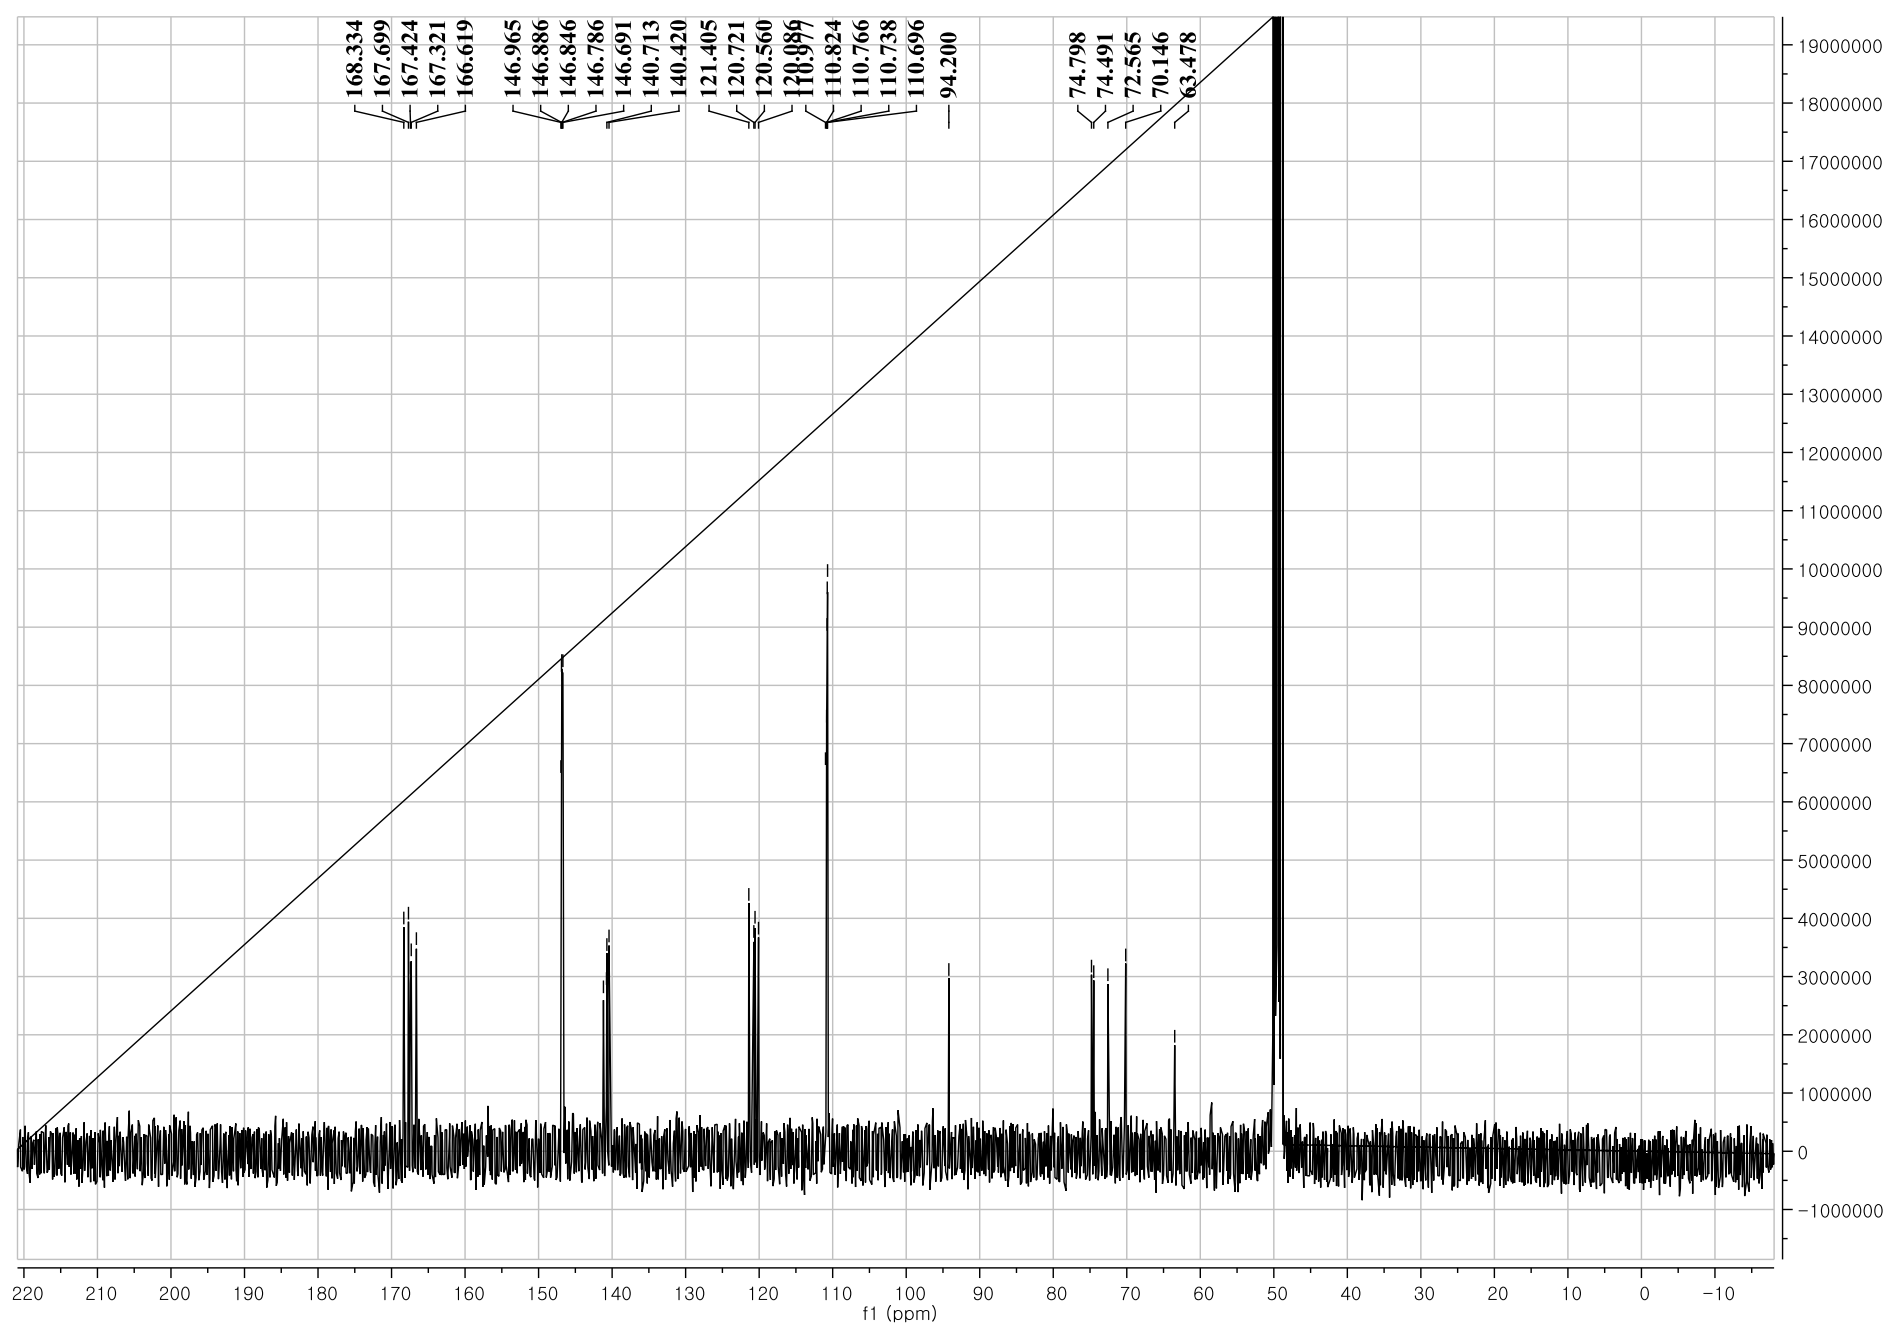

Figure S8. <sup>13</sup>C-NMR spectrum of compound 3 (100 MHz, CD<sub>3</sub>OD).

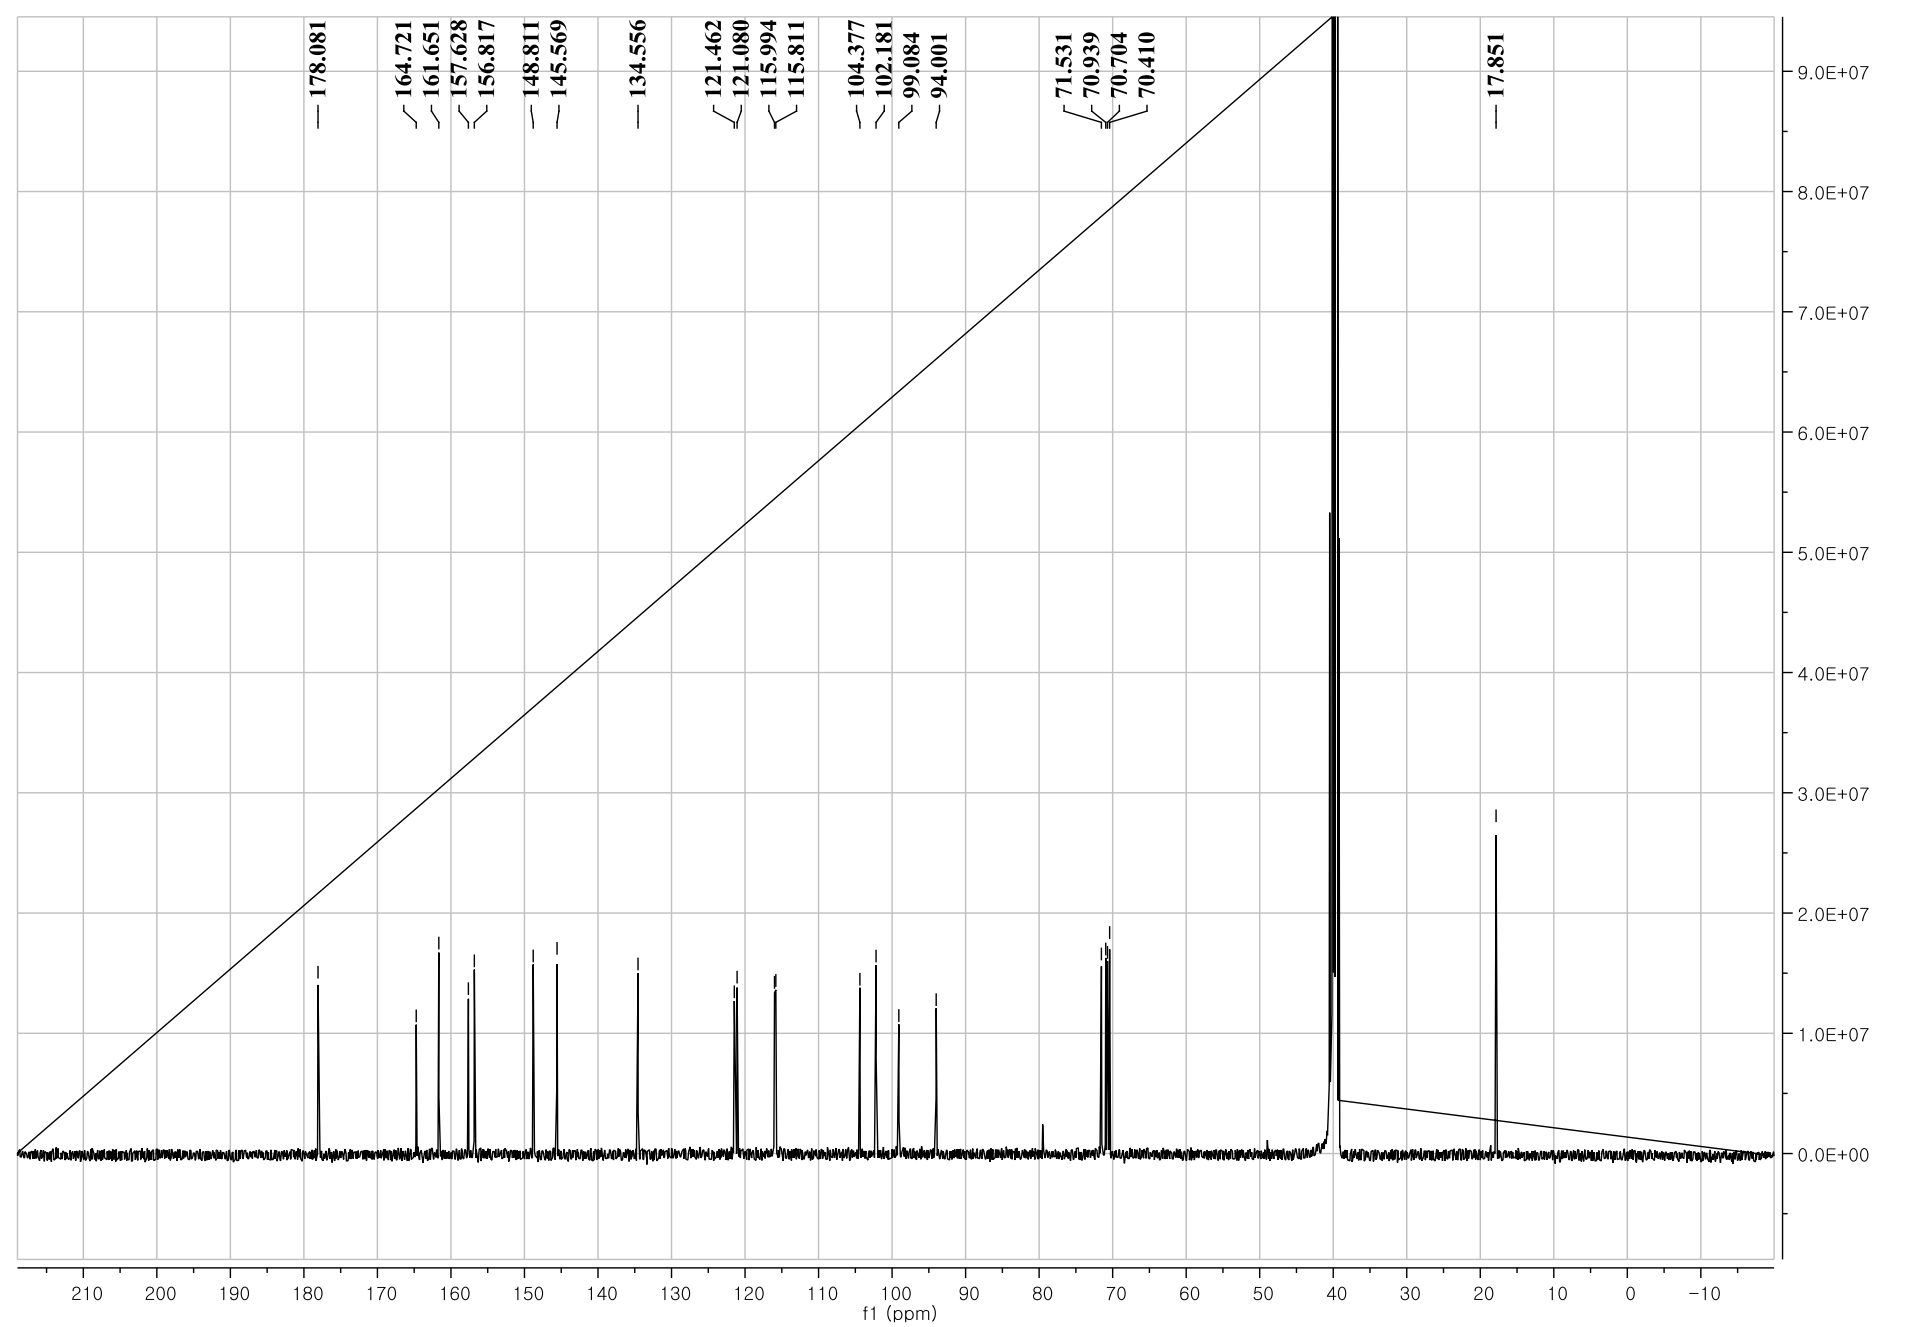

Figure S9.  $^{13}\text{C}$ -NMR spectrum of compound **4** (100 MHz,  $\text{DMSO-}d_6$ ).

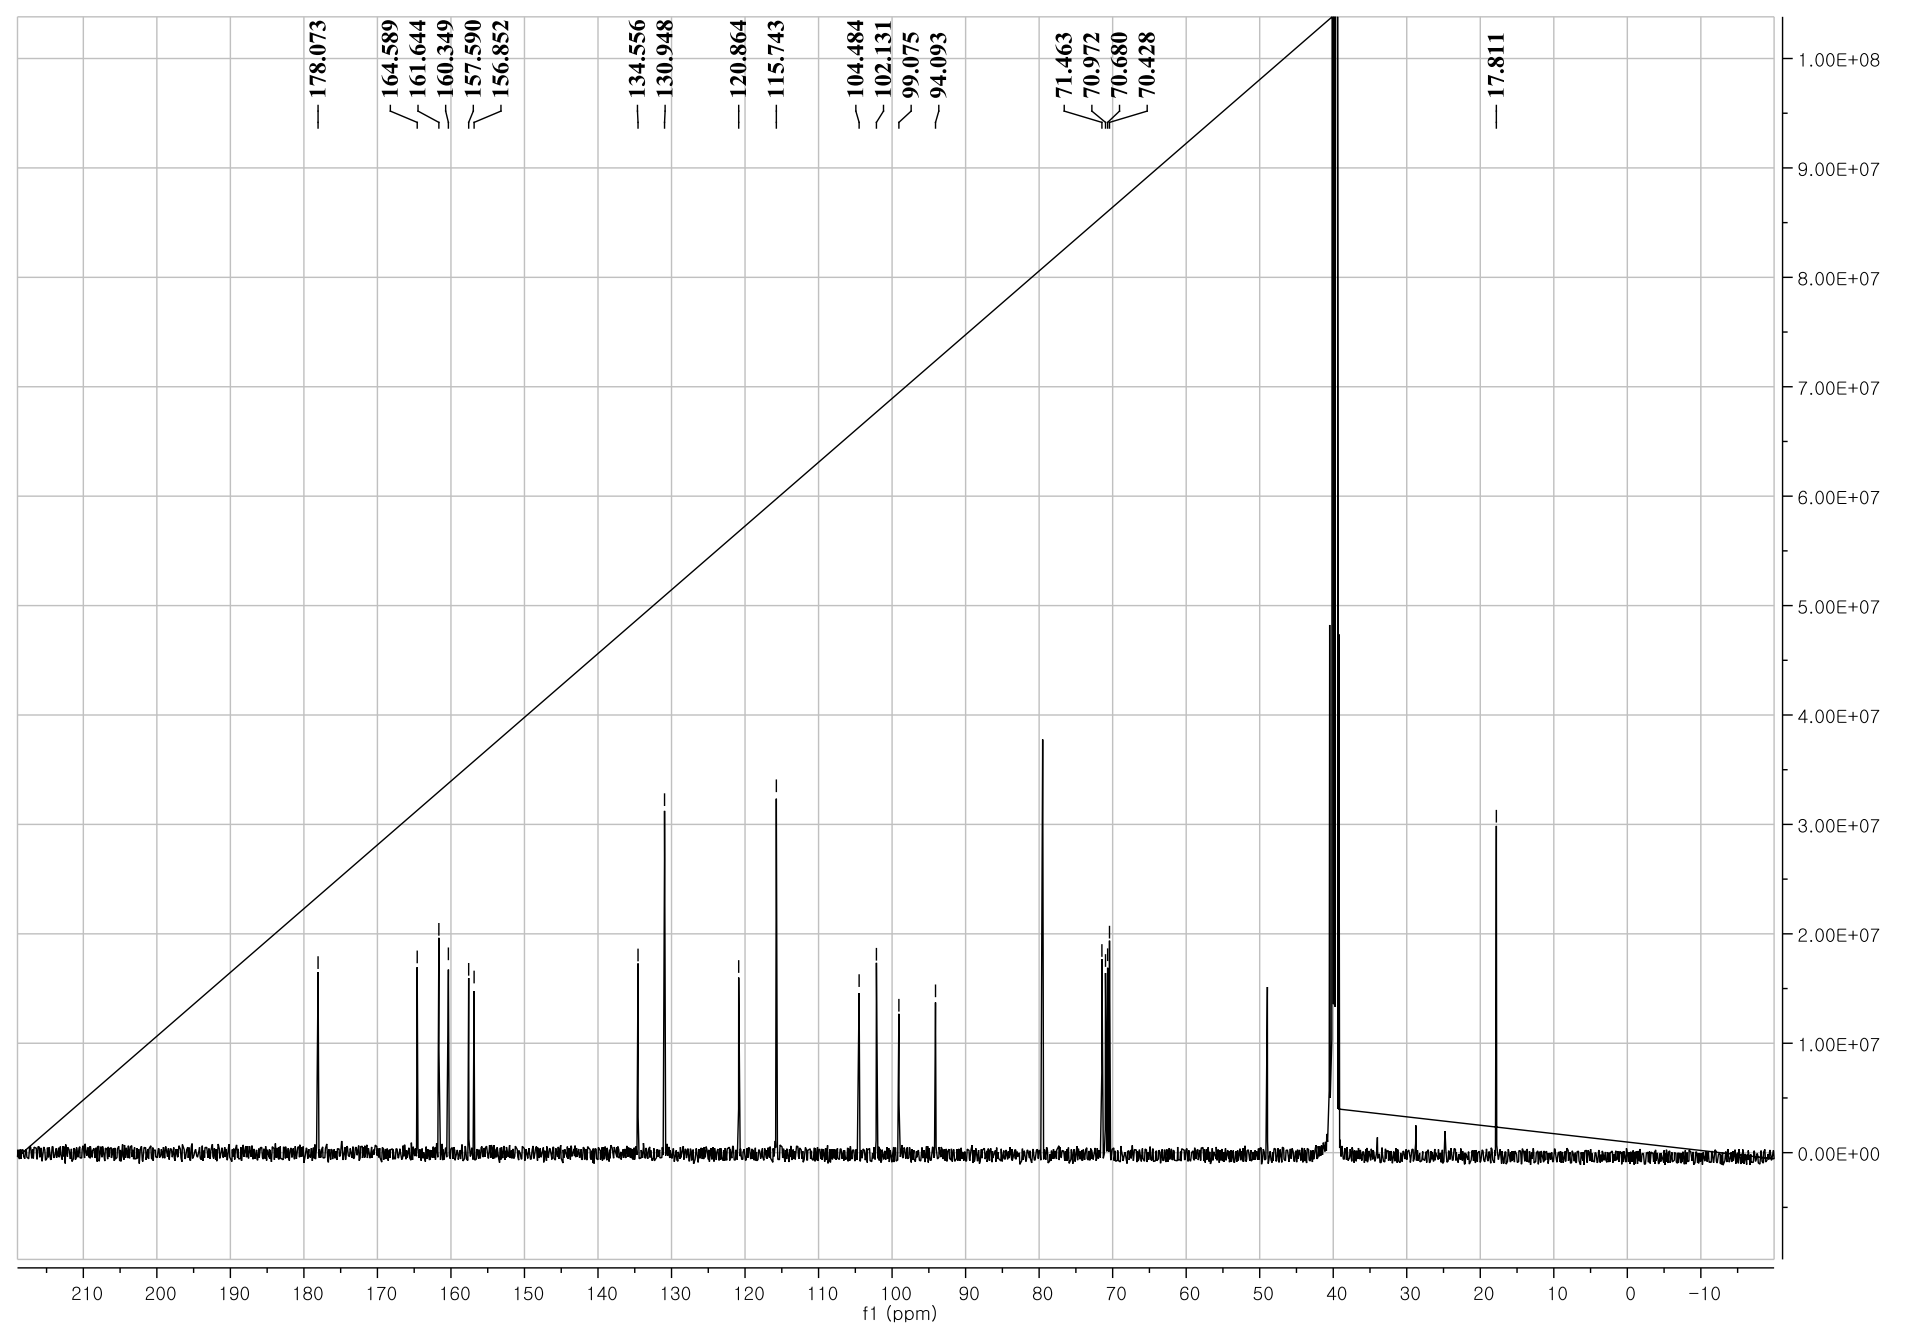

**Figure S10.**  $^{13}\text{C}$ -NMR spectrum of compound **5** (100 MHz,  $\text{DMSO-}d_6$ ).

[UV spectrum]

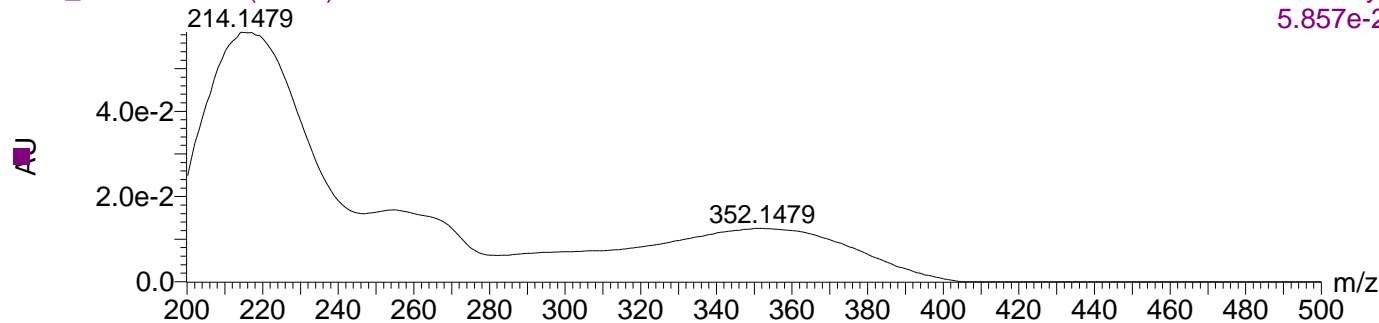

[MS Chromatogram] AAL\_sachun 301 (5.938)

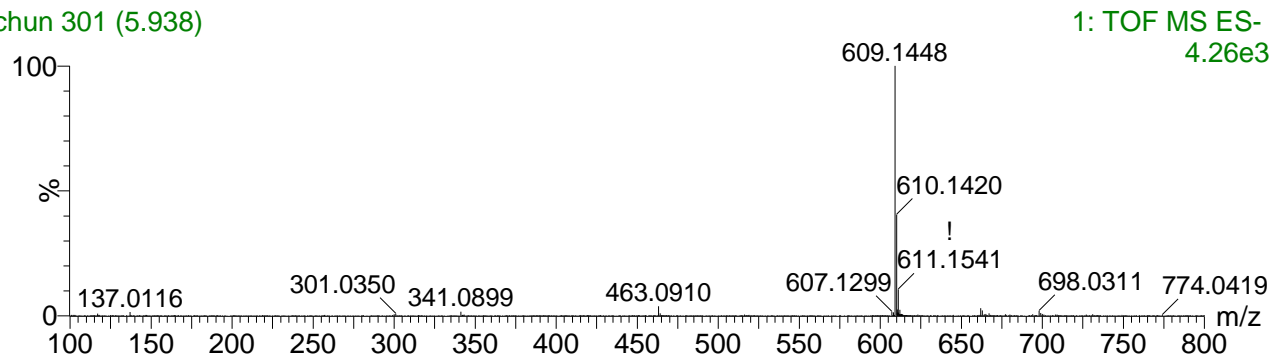1: TOF MS ES-  
4.26e3[MS<sup>2</sup> Chromatogram] AAL\_sachun 301 (5.947)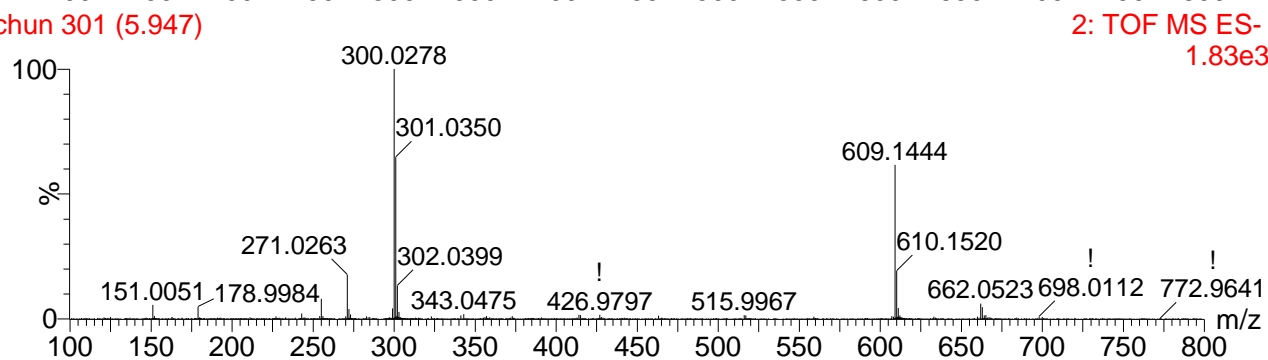2: TOF MS ES-  
1.83e3[Elemental Composition:  
HR-ESI/MS]**Single Mass Analysis**

Tolerance = 5.0 PPM / DBE: min = -1.5, max = 50.0

Element prediction: Off

Number of isotope peaks used for i-FIT = 3

Monoisotopic Mass, Even Electron Ions

178 formula(e) evaluated with 1 results within limits (up to 50 best isotopic matches for each mass)

Elements Used:

| Mass     | Calc. Mass | mDa  | PPM  | DBE  | Formula     | i-... | i-FIT Norm | Fit Conf % | C  | H  | O  |
|----------|------------|------|------|------|-------------|-------|------------|------------|----|----|----|
| 609,1448 | 609,1456   | -0,8 | -1,3 | 13,5 | C27 H29 O16 | 59,6  | n/a        | n/a        | 27 | 29 | 16 |

**Figure S11.** Identification of compound 1 by UPLC-qToF MS.

**Compound 2** AAL\_sachun 7481 (6.234)4: Diode Array  
9.139e-2

[UV spectrum]

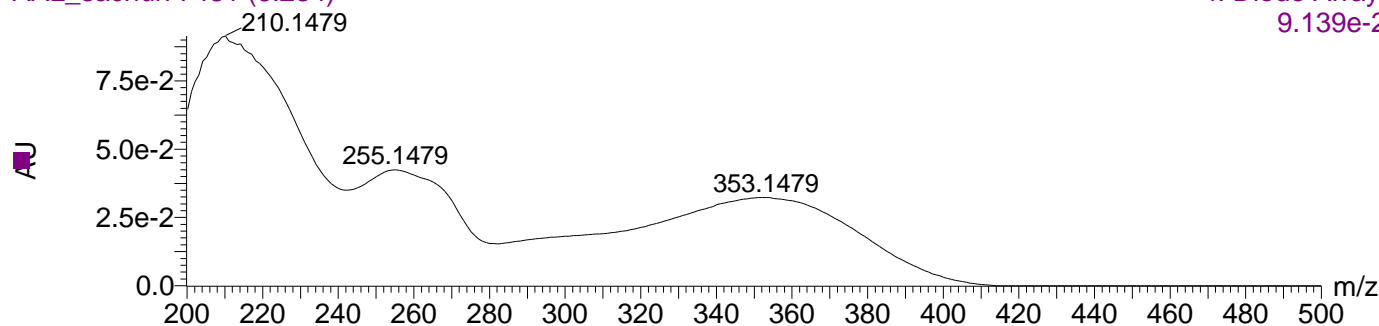

[MS Chromatogram] AAL\_sachun 318 (6.268)

1: TOF MS ES-  
1.13e4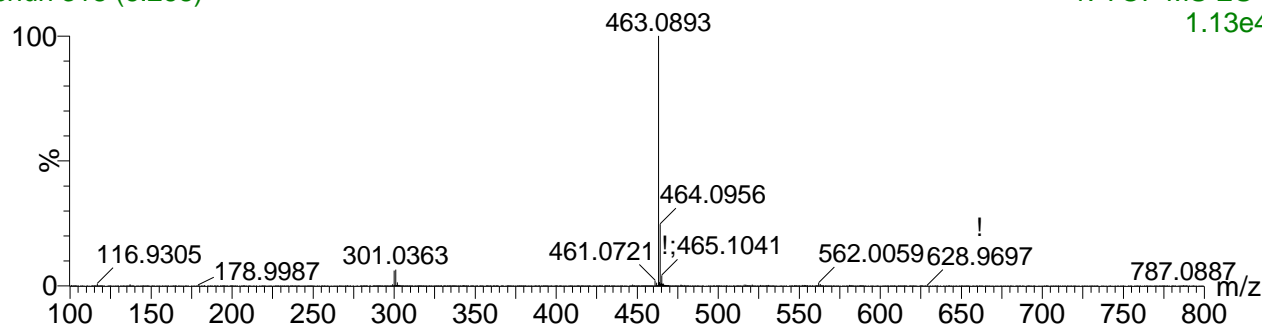[MS<sup>2</sup> Chromatogram] AAL\_sachun 318 (6.277)2: TOF MS ES-  
2.67e3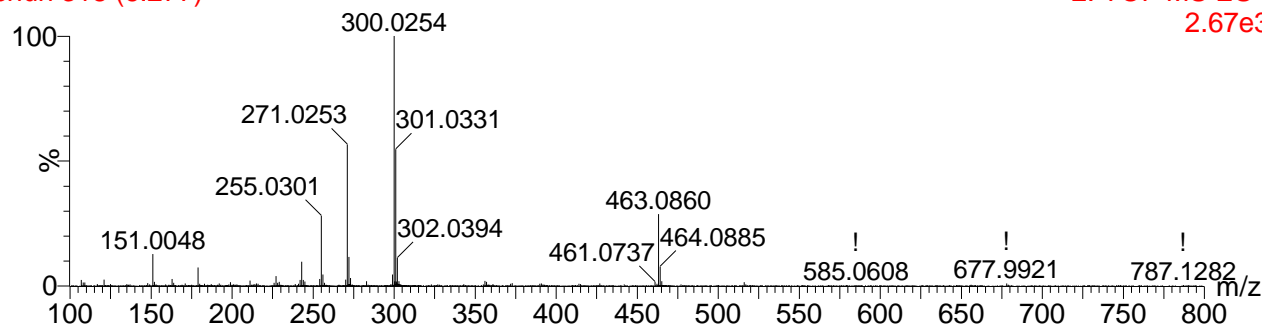[Elemental Composition:  
HR-ESI/MS]**Single Mass Analysis**

Tolerance = 5.0 PPM / DBE: min = -1.5, max = 50.0

Element prediction: Off

Number of isotope peaks used for i-FIT = 3

Monoisotopic Mass, Even Electron Ions

114 formula(e) evaluated with 1 results within limits (up to 50 best isotopic matches for each mass)

Elements Used:

| Mass     | Calc. Mass | mDa | PPM | DBE  | Formula                                         | i-FIT | i-FIT Norm | Fit Conf % | C  | H  | O  |
|----------|------------|-----|-----|------|-------------------------------------------------|-------|------------|------------|----|----|----|
| 463.0893 | 463.0877   | 1.6 | 3.5 | 12.5 | C <sub>21</sub> H <sub>19</sub> O <sub>12</sub> | 159.9 | n/a        | n/a        | 21 | 19 | 12 |

**Figure S12.** Identification of compound 2 by UPLC-qToF MS.

[UV spectrum]

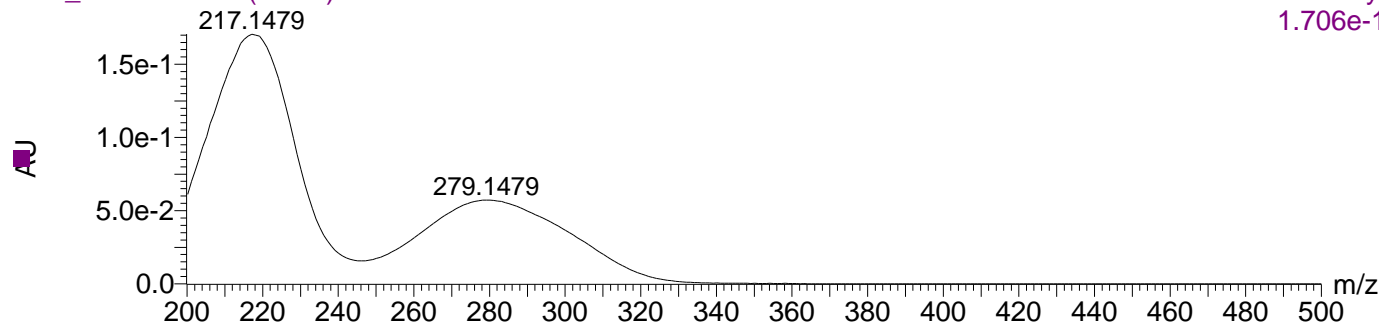

[MS Chromatogram] AAL\_sachun 376 (7.413)

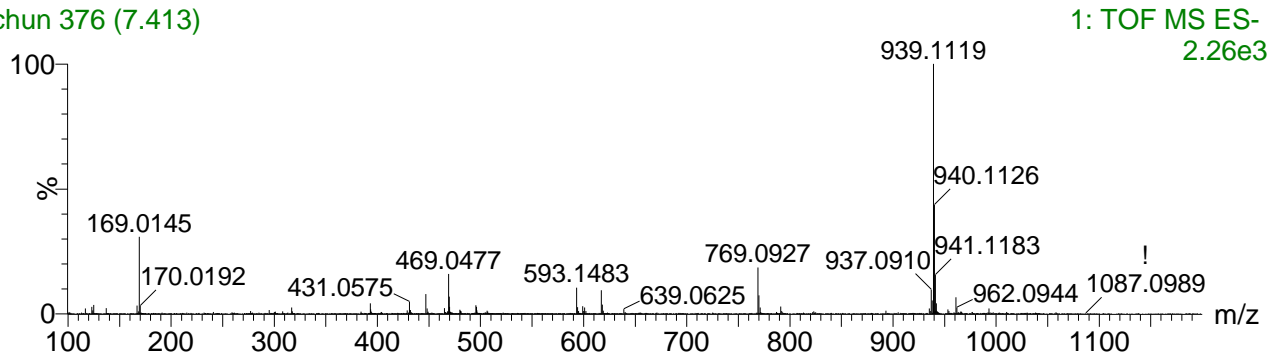

[MS<sup>2</sup> Chromatogram] AAL\_sachun 375 (7.404)

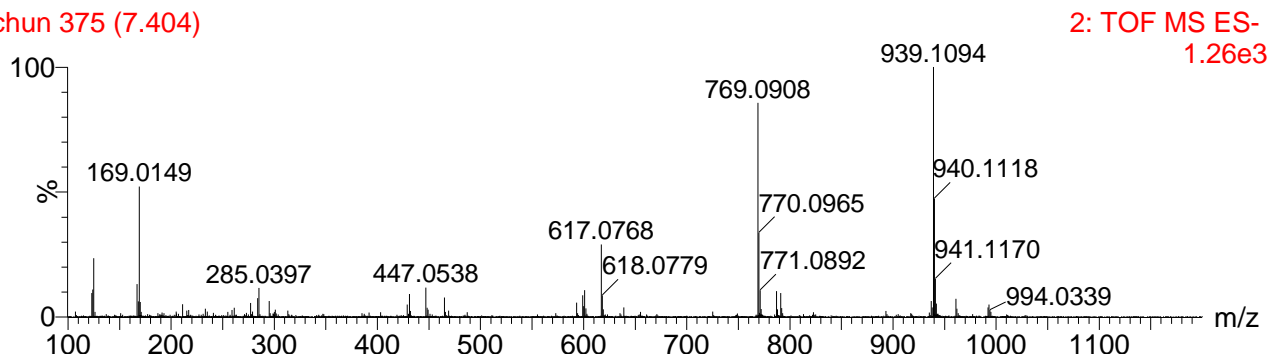

[Elemental Composition:  
HR-ESI/MS]

**Single Mass Analysis**

Tolerance = 5.0 PPM / DBE: min = -1.5, max = 50.0

Element prediction: Off

Number of isotope peaks used for i-FIT = 3

Monoisotopic Mass, Even Electron Ions

399 formula(e) evaluated with 3 results within limits (up to 50 best isotopic matches for each mass)

Elements Used:

| Mass     | Calc. Mass | mDa  | PPM  | DBE  | Formula     | i-... | i-FIT Norm | Fit Conf % | C  | H  | O  |
|----------|------------|------|------|------|-------------|-------|------------|------------|----|----|----|
| 939,1119 | 939,1104   | 1,5  | 1,6  | 26,5 | C41 H31 O26 | 43,2  | 0,007      | 99,31      | 41 | 31 | 26 |
|          | 939,1162   | -4,3 | -4,6 | 17,5 | C34 H35 O31 | 48,2  | 5,017      | 0,66       | 34 | 35 | 31 |
|          | 939,1139   | -2,0 | -2,1 | 48,5 | C59 H23 O13 | 51,3  | 8,097      | 0,03       | 59 | 23 | 13 |

**Figure S13.** Identification of compound **3** by UPLC-qToF MS.

**Compound 4** AAL\_sachun 9345 (7.787)4: Diode Array  
3.919e-1

[UV spectrum]

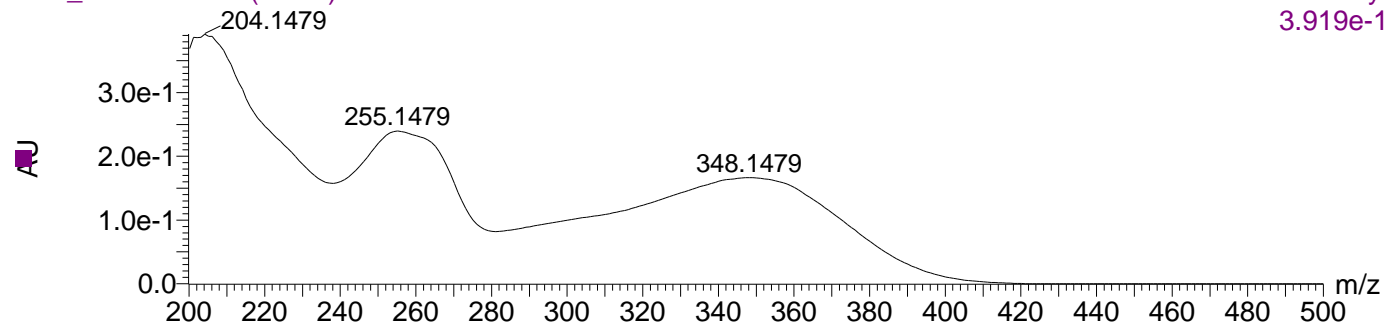

[MS Chromatogram] AAL\_sachun 398 (7.850)

1: TOF MS ES-  
3.44e4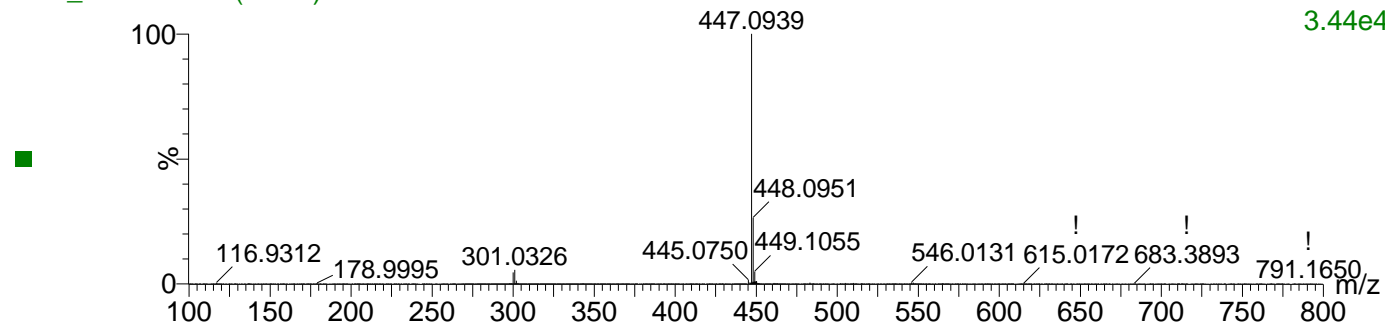[MS<sup>2</sup> Chromatogram] AAL\_sachun 397 (7.840)2: TOF MS ES-  
1.15e4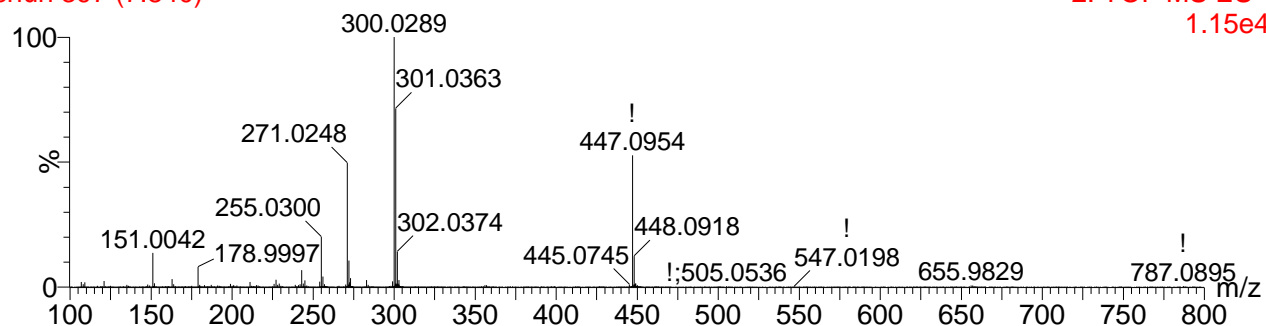[Elemental Composition:  
HR-ESI/MS]**Single Mass Analysis**

Tolerance = 5.0 PPM / DBE: min = -1.5, max = 50.0

Element prediction: Off

Number of isotope peaks used for i-FIT = 3

Monoisotopic Mass, Even Electron Ions

108 formula(e) evaluated with 1 results within limits (up to 50 best isotopic matches for each mass)

Elements Used:

| Mass     | Calc. Mass | mDa | PPM | DBE  | Formula                                         | i-FIT | i-FIT Norm | Fit Conf % | C  | H  | O  |
|----------|------------|-----|-----|------|-------------------------------------------------|-------|------------|------------|----|----|----|
| 447.0939 | 447.0927   | 1.2 | 2.7 | 12.5 | C <sub>21</sub> H <sub>19</sub> O <sub>11</sub> | 188.1 | n/a        | n/a        | 21 | 19 | 11 |

**Figure S14.** Identification of compound **4** by UPLC-qTof MS.

[UV spectrum]

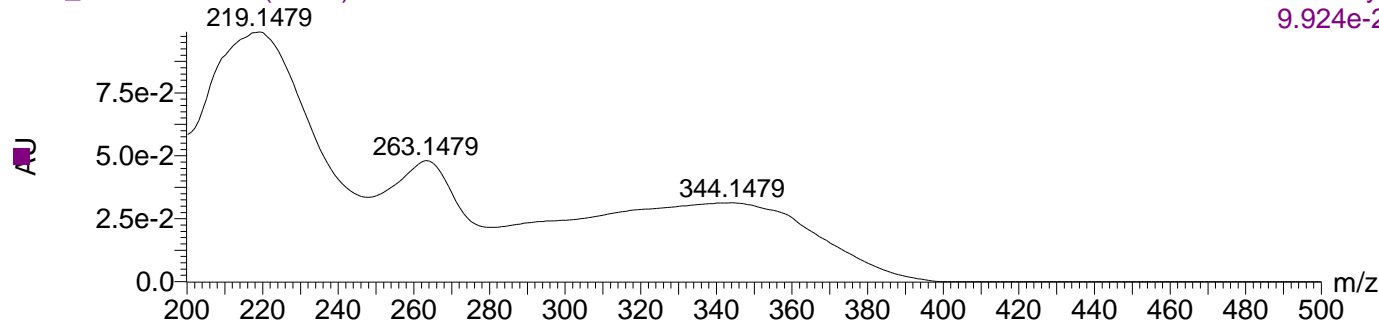

[MS Chromatogram] AAL\_sachun 488 (9.618)

1: TOF MS ES-  
1.22e4

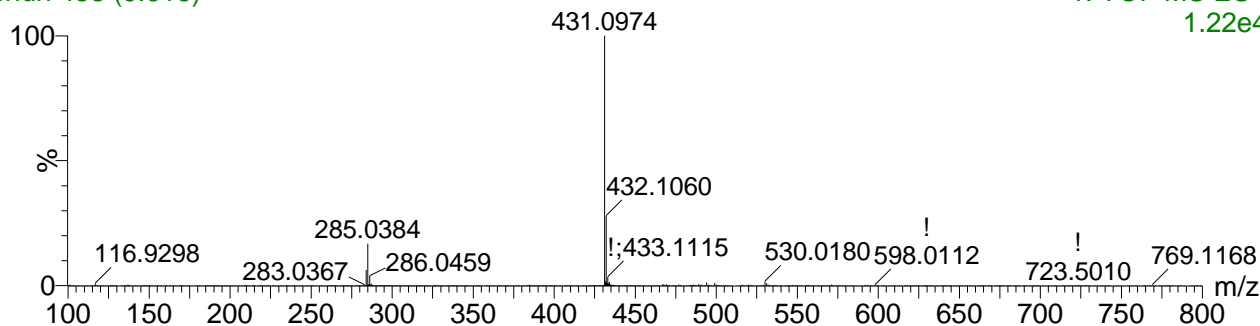

[MS<sup>2</sup> Chromatogram] AAL\_sachun 487 (9.609)

2: TOF MS ES-  
2.14e3

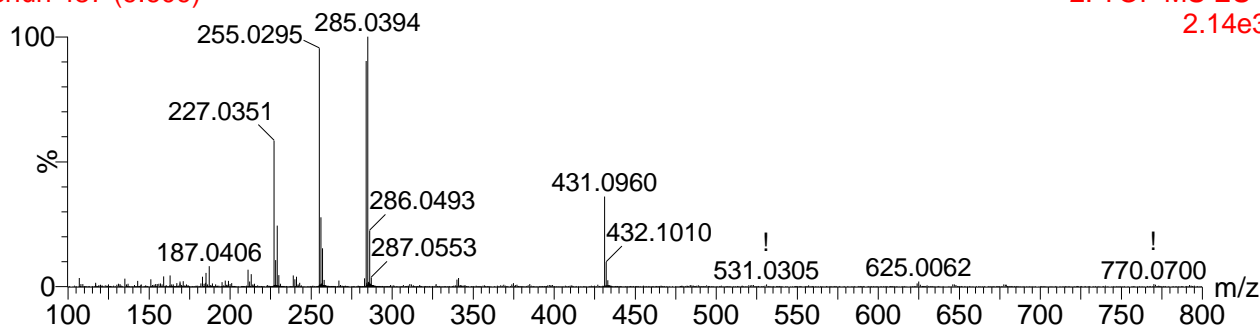

[Elemental Composition:  
HR-ESI/MS]

**Single Mass Analysis**

Tolerance = 5.0 PPM / DBE: min = -1.5, max = 50.0

Element prediction: Off

Number of isotope peaks used for i-FIT = 3

Monoisotopic Mass, Even Electron Ions

102 formula(e) evaluated with 1 results within limits (up to 50 best isotopic matches for each mass)

Elements Used:

| Mass     | Calc. Mass | mDa  | PPM  | DBE  | Formula                                         | i-FIT | i-FIT Norm | Fit Conf % | C  | H  | O  |
|----------|------------|------|------|------|-------------------------------------------------|-------|------------|------------|----|----|----|
| 431.0974 | 431.0978   | -0.4 | -0.9 | 12.5 | C <sub>21</sub> H <sub>19</sub> O <sub>10</sub> | 164.4 | n/a        | n/a        | 21 | 19 | 10 |

**Figure S15.** Identification of compound **5** by UPLC-qToF MS.



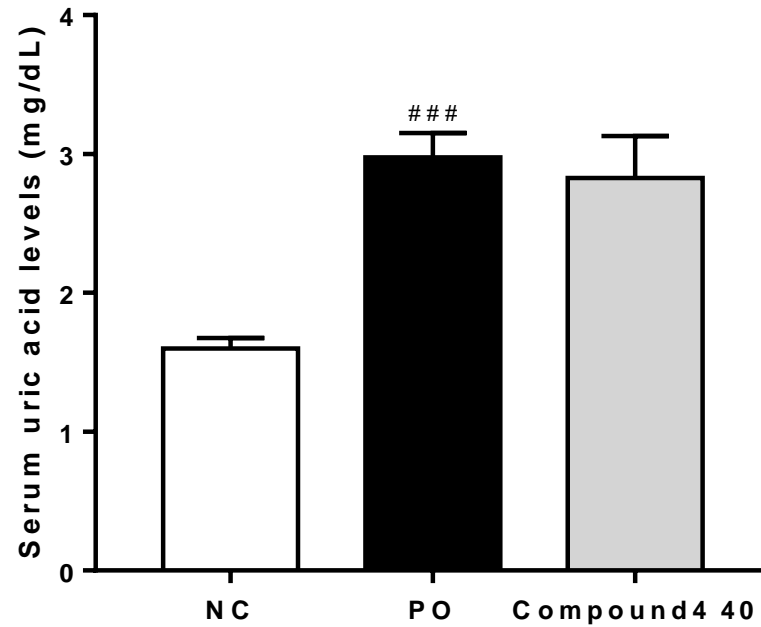

**Figure S16.** Effects of compound 4 (40 mg/kg) on serum uric acid levels in PO-induced hyperuricemic rats. NC, normal control group; PO, potassium oxonate-induced hyperuricemia group. Data are expressed as the mean  $\pm$  SEM ( $n=6$ ). ### $p<0.001$  vs. the NC group; \* $p<0.05$  and \*\*\* $p<0.005$  vs. the PO group.
